# Supplementary material for: Horse Chestnut Saponins–Escins, Isoescins, Transescins, and Desacylescins
Source: MDPI journal article supplement (doi:10.3390/molecules28052087), 2023-02-23
Supplement: s1 [file s1]

# Horse Chestnut saponins – Escins, Isoescins, Transescins, and Desacylescins

Philippe Savarino, Emmanuel Colson, Julien André, and Pascal Gerbaux \*

Organic Synthesis and Mass Spectrometry Laboratory (S<sup>2</sup>MOs), University of Mons – UMONS, 23 Place du Parc, 7100 Mons, Belgium; philippe.savarino@umons.ac.be (P.S.); colson-emmanuel@outlook.be (E.C.); ailurus.jul@gmail.com (J.A.)

\* Correspondence: pascal.gerbaux@umons.ac.be (P.G.)

## Supporting information

**Escin Ia (7.96 min)**

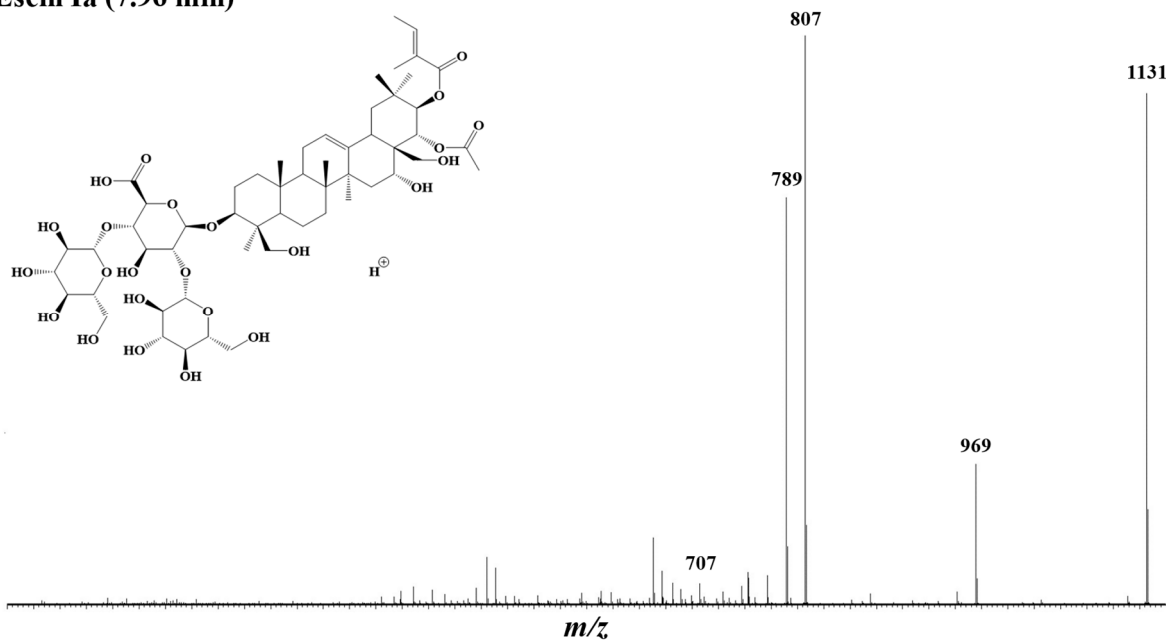

**Figure S1:** LC-MSMS(+) analysis of Escins I, II and III enriched-extract (EE): CID spectrum (15 eV) recorded for the  $m/z$  1131 precursor ions  $[M+H]^+$  at 7.96 min retention time (Escin Ia)

**Escin Ib (8.25 min)**

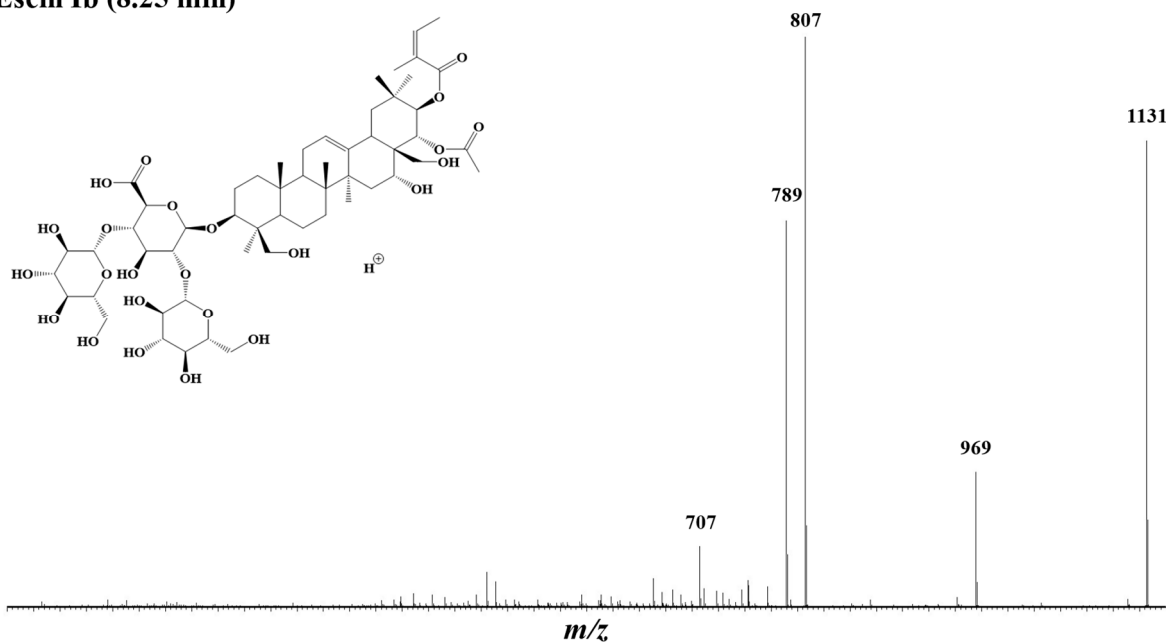

**Figure S2:** LC-MSMS(+) analysis of Escins I, II and III enriched-extract (EE): CID spectrum (15 eV) recorded for the  $m/z$  1131 precursor ions  $[M+H]^+$  at 8.25 min retention time (Escin Ib)

**Isoescsin Ia (8.59 min)**

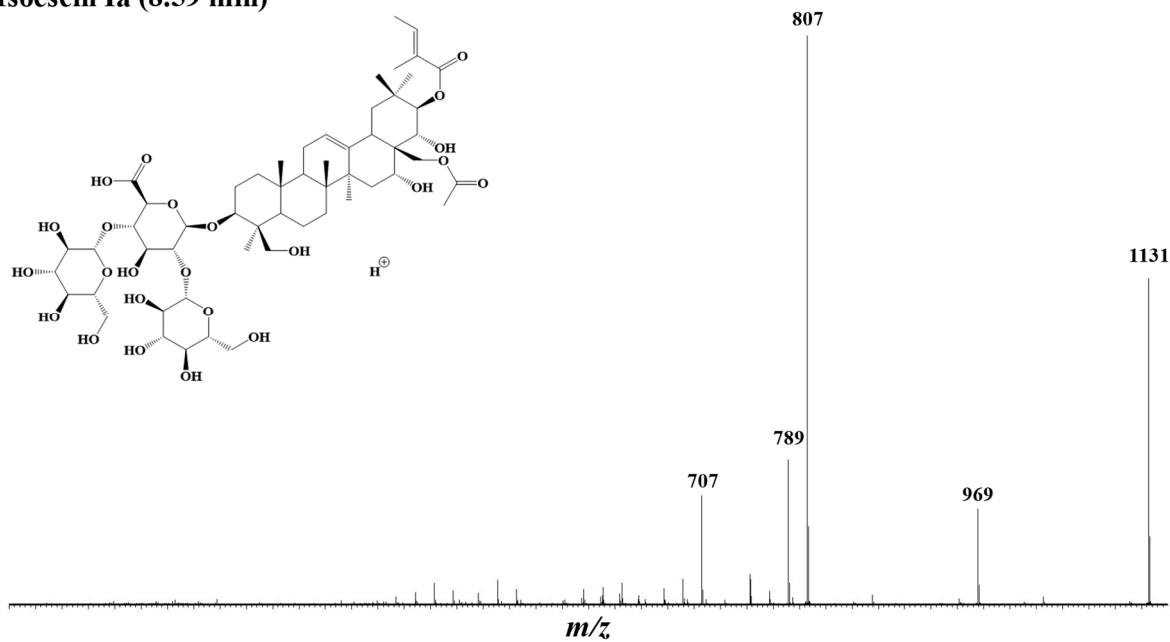

**Figure S3:** LC-MSMS(+) analysis of Escins I, II and III enriched-extract (EE): CID spectrum (15 eV) recorded for the  $m/z$  1131 precursor ions  $[M+H]^+$  at 8.59 min retention time (Isoescsin Ia)

**Isoescsin Ib (8.88 min)**

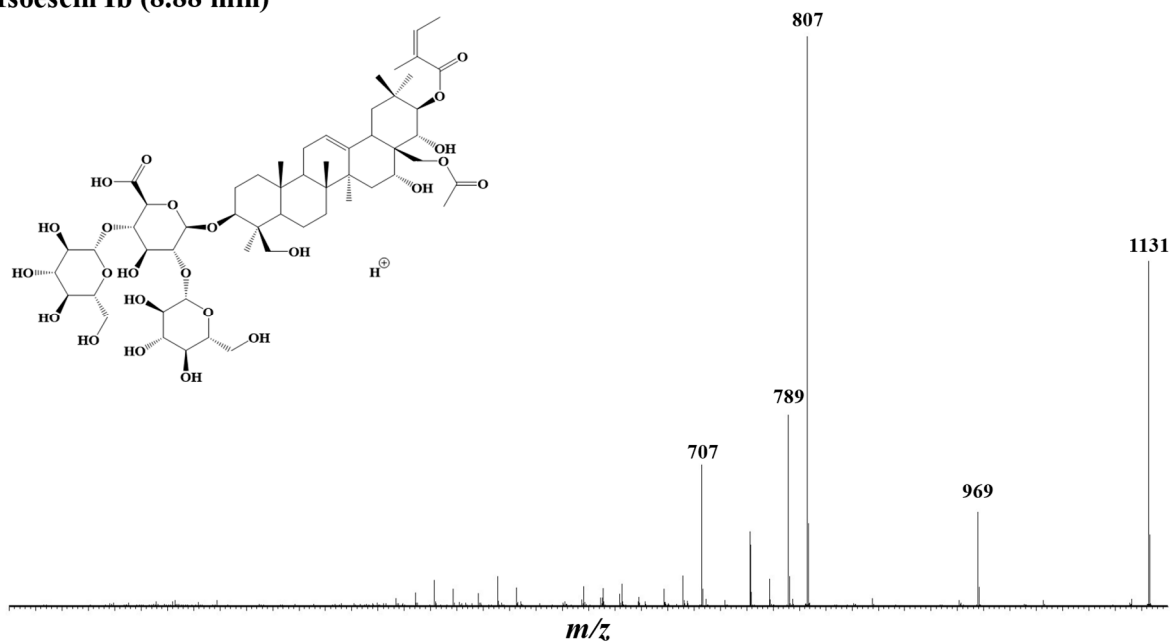

**Figure S4:** LC-MSMS(+) analysis of Escins I, II and III enriched-extract (EE): CID spectrum (15 eV) recorded for the  $m/z$  1131 precursor ions  $[M+H]^+$  at 8.88 min retention time (Isoescsin Ib)

**Transescin Ia (6.59 min)**

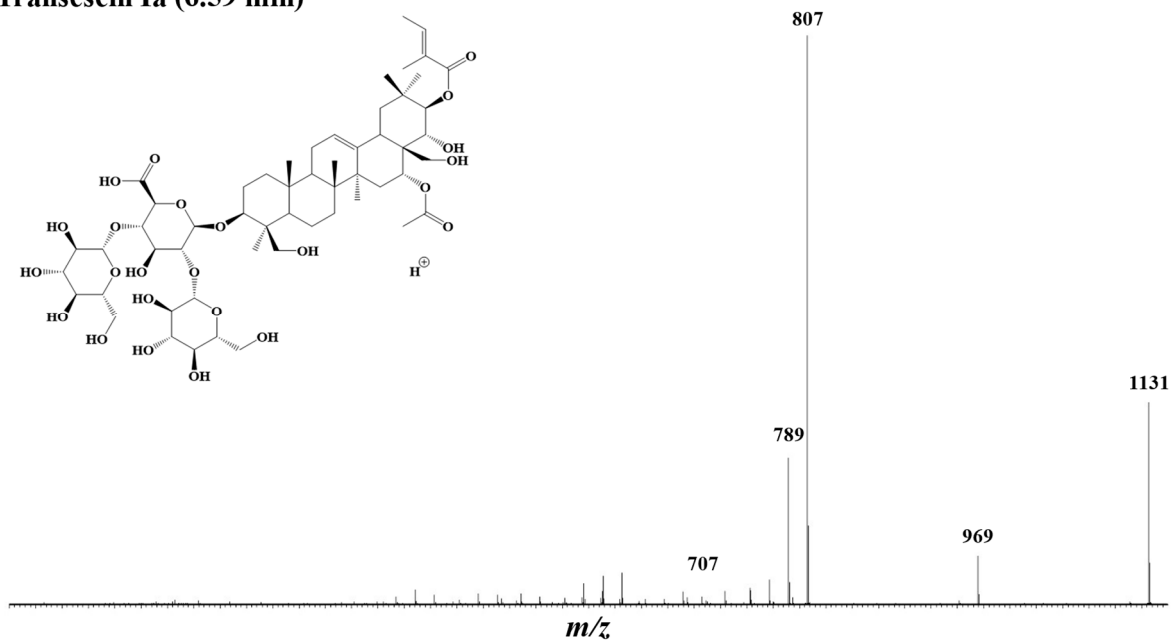

**Figure S5:** LC-MSMS(+) analysis of Transesterification extract (TE): CID spectrum (15 eV) recorded for the  $m/z$  1131 precursor ions  $[M+H]^+$  at 6.59 min retention time (Transescin Ia)

**Transescin Ib (6.86 min)**

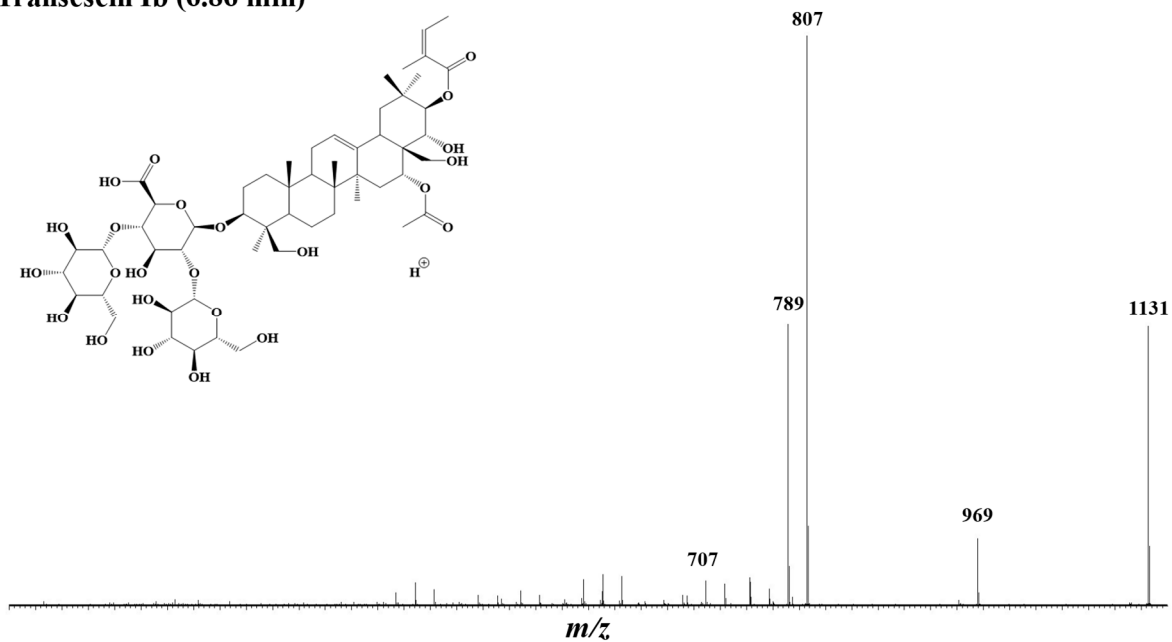

**Figure S6:** LC-MSMS(+) analysis of Transesterification extract (TE): CID spectrum (15 eV) recorded for the  $m/z$  1131 precursor ions  $[M+H]^+$  at 6.86 min retention time (Transescin Ib)

**Desacylescin I (5.38 min)**

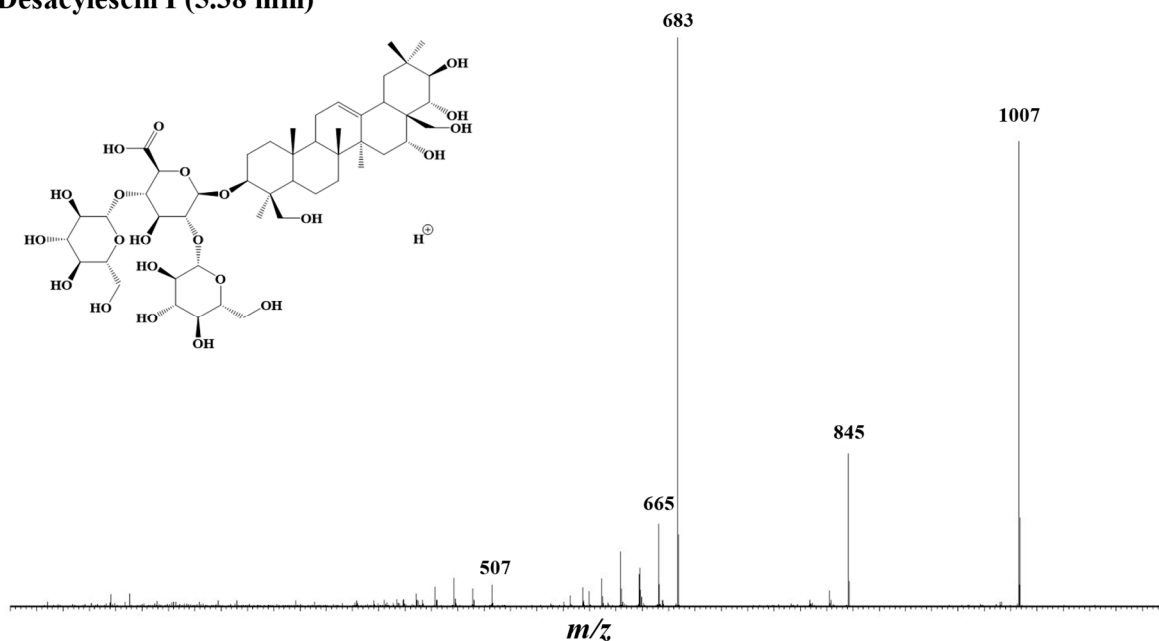

**Figure S7:** LC-MSMS(+) analysis of Hydrolysis extract (HE): CID spectrum (15 eV) recorded for the  $m/z$  1007 precursor ions  $[M+H]^+$  at 5.38 min retention time (Desacylescin I)

**Escin IIa (7.98 min)**

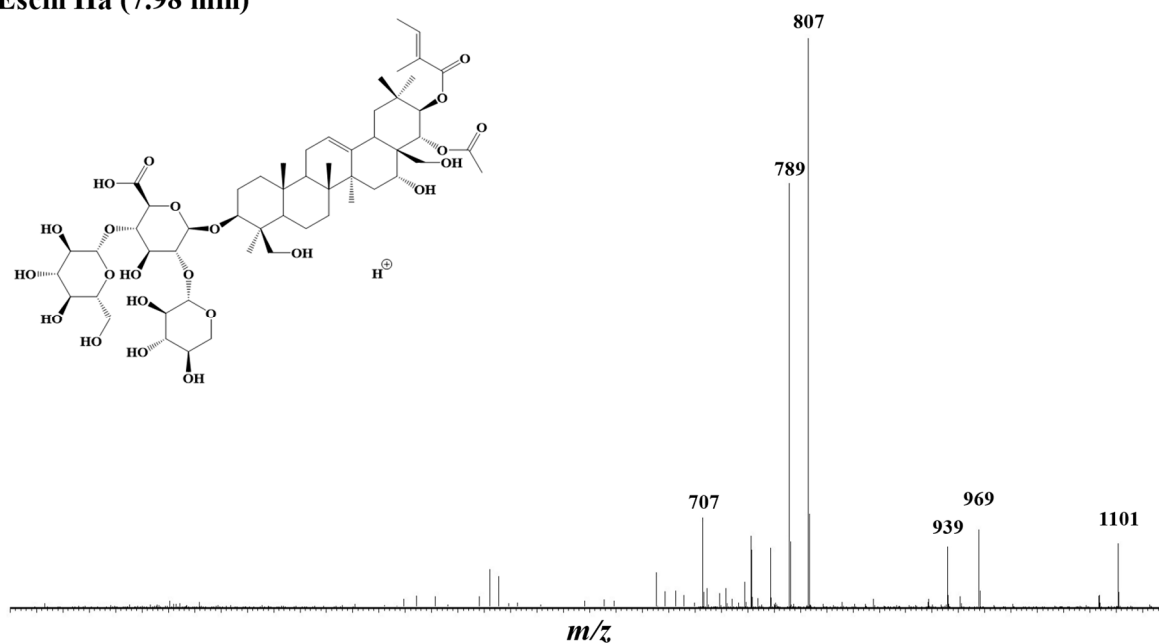

**Figure S8:** LC-MSMS(+) analysis of Escins I, II and III enriched-extract (EE): CID spectrum (15 eV) recorded for the  $m/z$  1101 precursor ions  $[M+H]^+$  at 7.98 min retention time (Escin IIa)

**Escin IIb (8.28 min)**

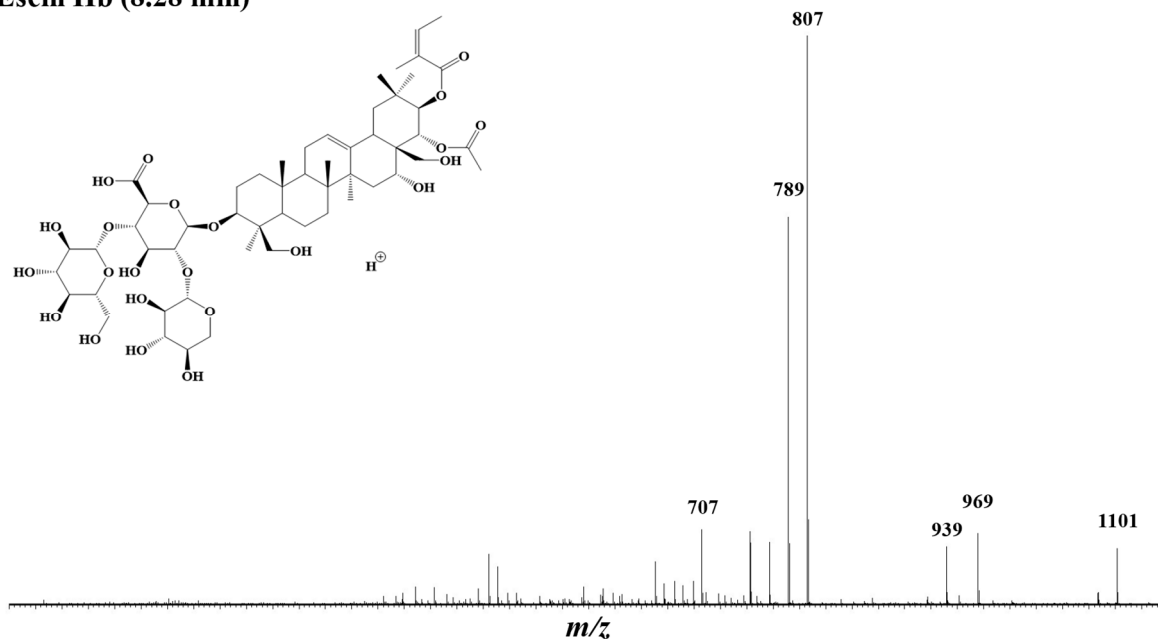

**Figure S9:** LC-MSMS(+) analysis of Escins I, II and III enriched-extract (EE): CID spectrum (15 eV) recorded for the  $m/z$  1101 precursor ions  $[M+H]^+$  at 8.28 min retention time (Escin IIb)

**Isoescsin IIa (8.66 min)**

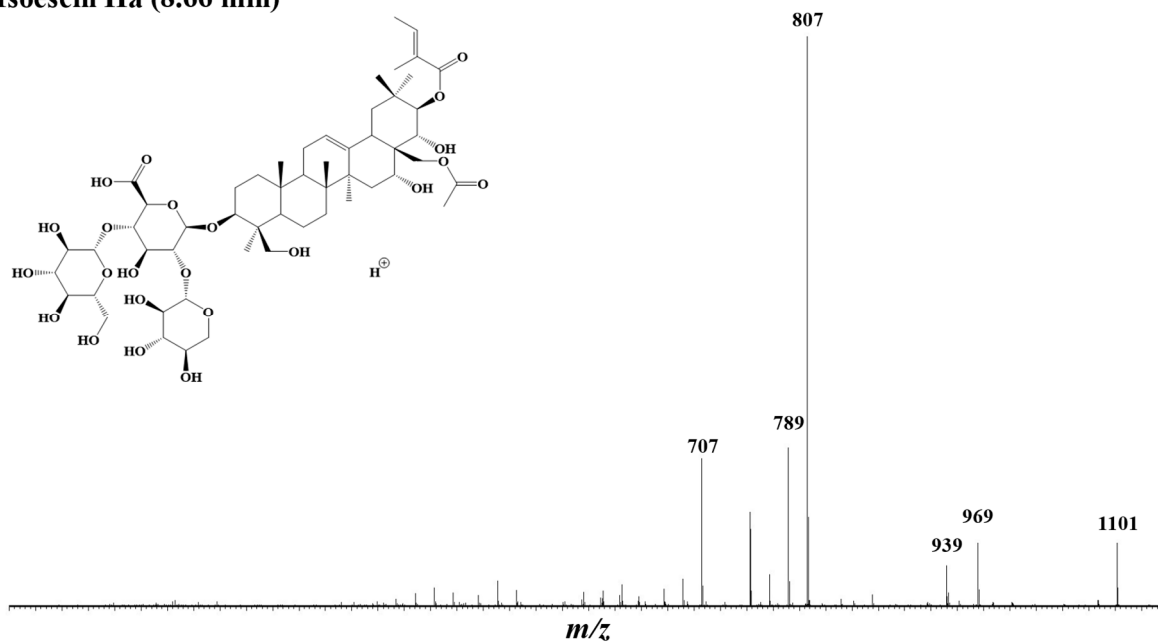

**Figure S10:** LC-MSMS(+) analysis of Escins I, II and III enriched-extract (EE): CID spectrum (15 eV) recorded for the  $m/z$  1101 precursor ions  $[M+H]^+$  at 8.66 min retention time (Isoescsin IIa)

**Isoescsin IIb (8.94 min)**

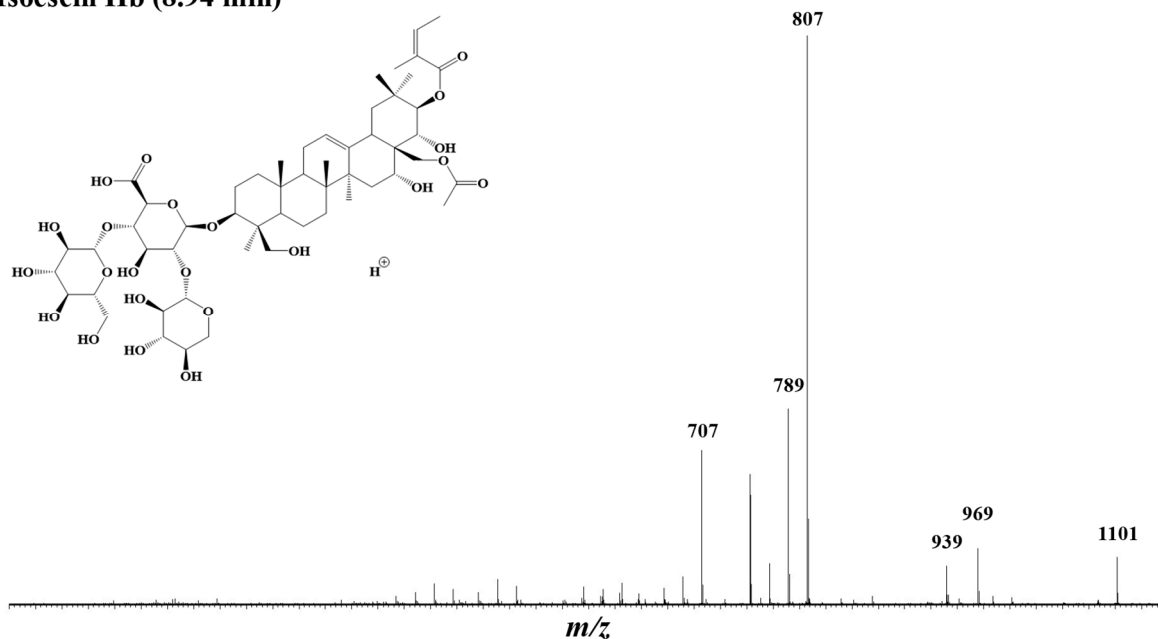

**Figure S11:** LC-MSMS(+) analysis of Escins I, II and III enriched-extract (EE): CID spectrum (15 eV) recorded for the  $m/z$  1101 precursor ions  $[M+H]^+$  at 8.94 min retention time (Isoescsin IIb)

**Transescsin IIa (6.58 min)**

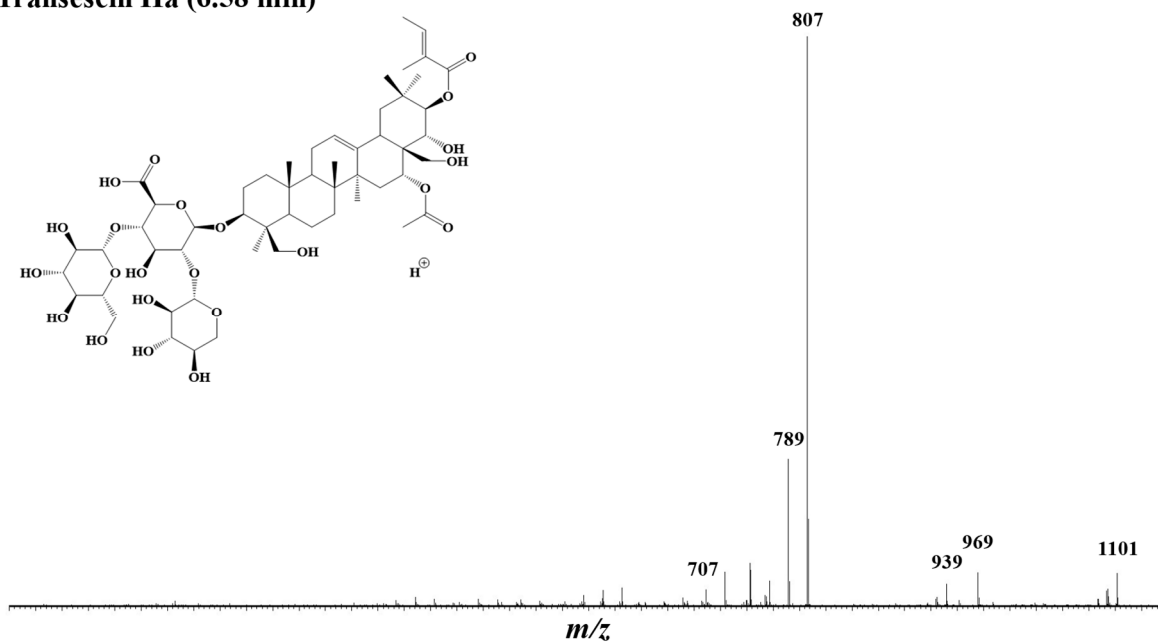

**Figure S12:** LC-MSMS(+) analysis of Transesterification extract (TE): CID spectrum (15 eV) recorded for the  $m/z$  1101 precursor ions  $[M+H]^+$  at 6.58 min retention time (Transescsin IIa)

**Transescin IIb (6.85 min)**

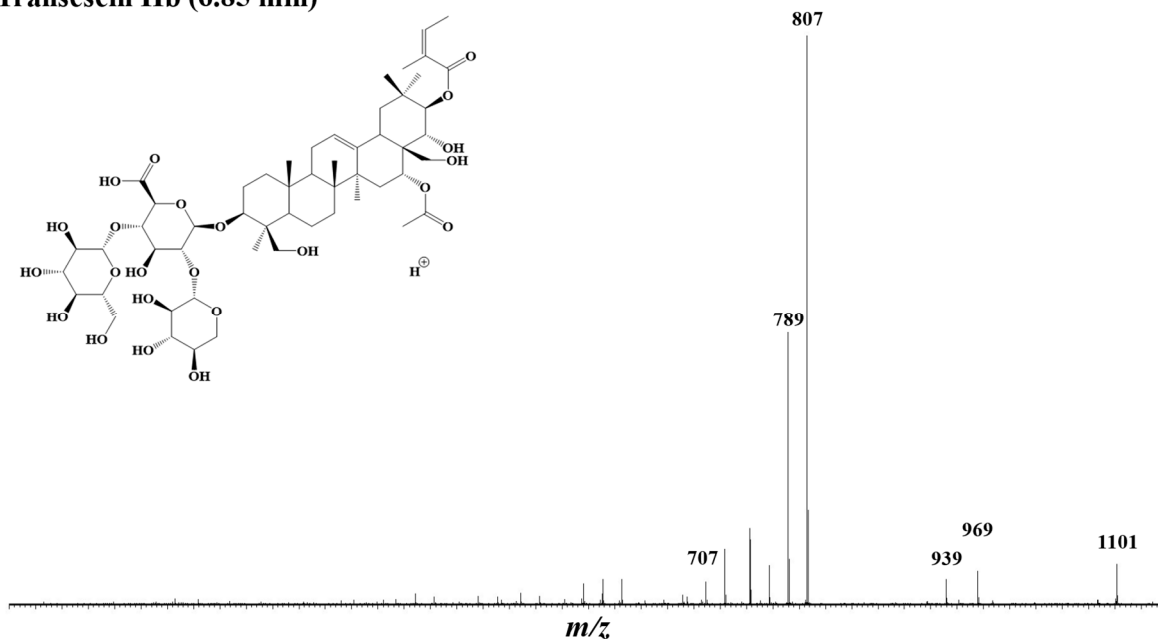

**Figure S13:** LC-MSMS(+) analysis of Transesterification extract (TE): CID spectrum (15 eV) recorded for the  $m/z$  1101 precursor ions  $[M+H]^+$  at 6.85 min retention time (Transescin IIb)

**Desacylescins II (5.36 min)**

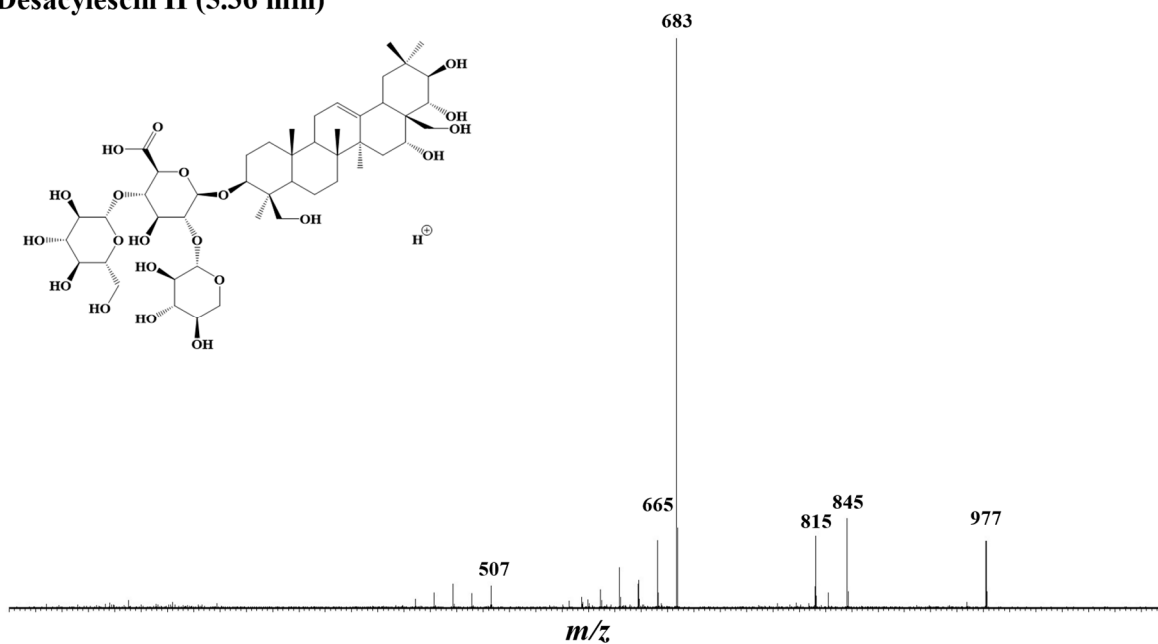

**Figure S14:** LC-MSMS(+) analysis of Hydrolysis extract (HE): CID spectrum (15 eV) recorded for the  $m/z$  977 precursor ions  $[M+H]^+$  at 5.36 min retention time (Desacylescins II)



**Escin IIIa (8.45 min)**

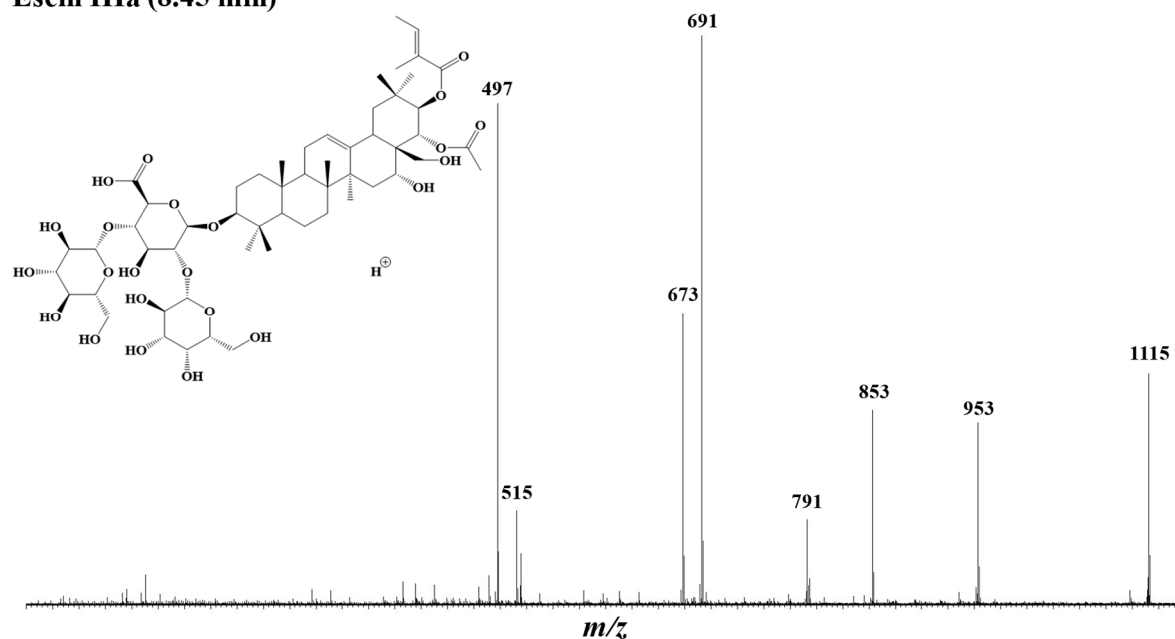

**Figure S15:** LC-MSMS(+) analysis of Escins I, II and III enriched-extract (EE): CID spectrum (15 eV) recorded for the  $m/z$  1115 precursor ions  $[M+H]^+$  at 8.45 min retention time (Escin IIIa)

**Escin IIIb (8.84 min)**

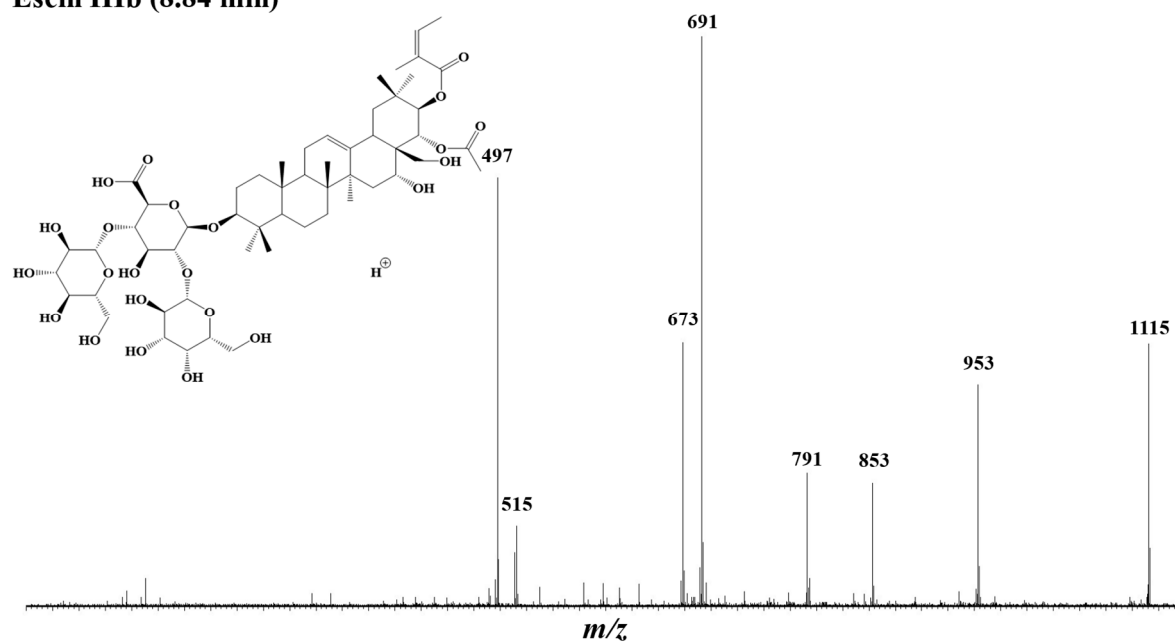

**Figure S16:** LC-MSMS(+) analysis of Escins I, II and III enriched-extract (EE): CID spectrum (15 eV) recorded for the  $m/z$  1115 precursor ions  $[M+H]^+$  at 8.84 min retention time (Escin IIIb)

**Isoescsin IIIa (9.18 min)**

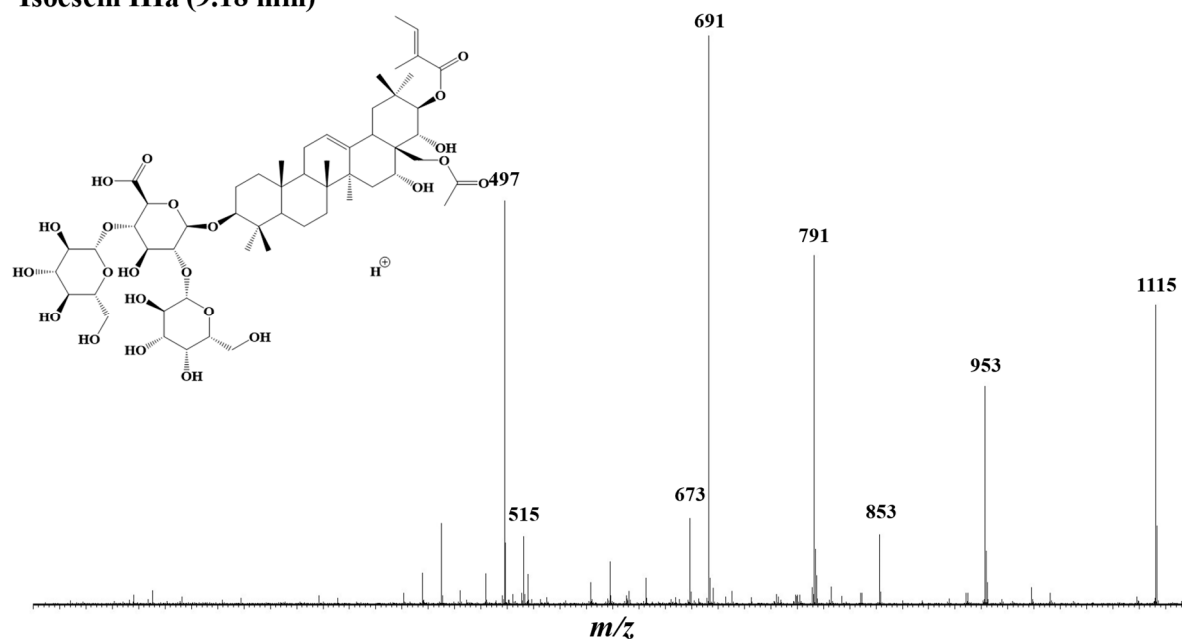

**Figure S17:** LC-MSMS(+) analysis of Escins I, II and III enriched-extract (EE): CID spectrum (15 eV) recorded for the  $m/z$  1115 precursor ions  $[M+H]^+$  at 9.18 min retention time (Isoescsin IIIa)

**Isoescsin IIIb (9.54 min)**

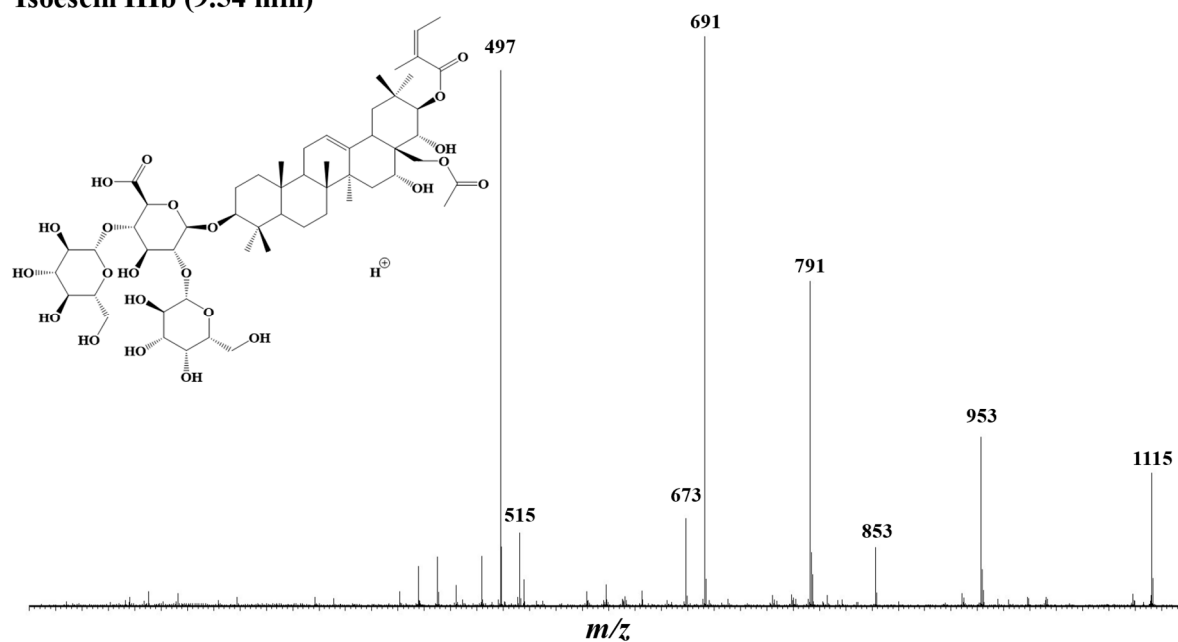

**Figure S18:** LC-MSMS(+) analysis of Escins I, II and III enriched-extract (EE): CID spectrum (15 eV) recorded for the  $m/z$  1115 precursor ions  $[M+H]^+$  at 9.54 min retention time (Isoescsin IIIb)

**Transescin IIIa (7.00 min)**

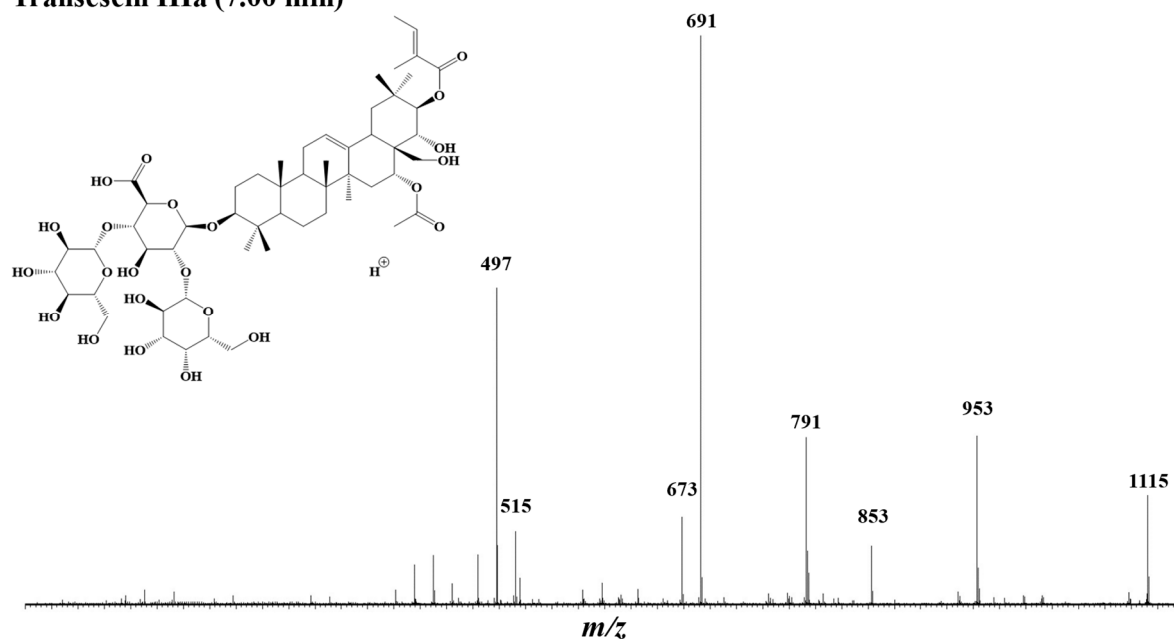

**Figure S19:** LC-MSMS(+) analysis of Transesterification extract (TE): CID spectrum (15 eV) recorded for the  $m/z$  1115 precursor ions  $[M+H]^+$  at 7.00 min retention time (Transescin IIIa)

**Transescin IIIb (7.27 min)**

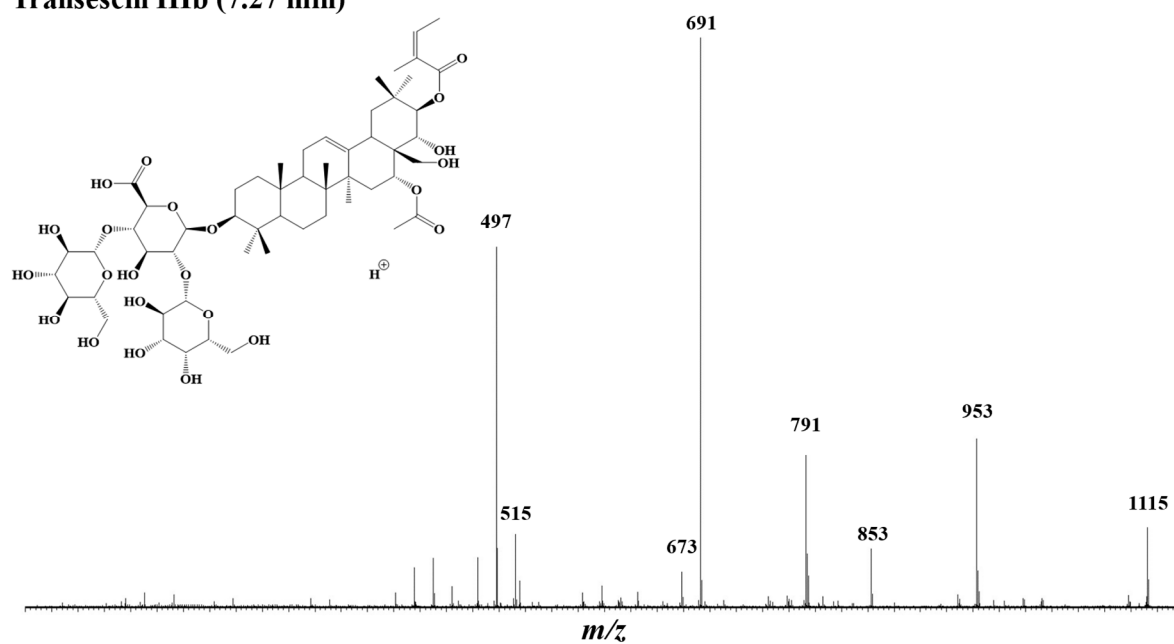

**Figure S20:** LC-MSMS(+) analysis of Transesterification extract (TE): CID spectrum (15 eV) recorded for the  $m/z$  1115 precursor ions  $[M+H]^+$  at 7.27 min retention time (Transescin IIIb)

**Desacylescin III (5.39 min)**

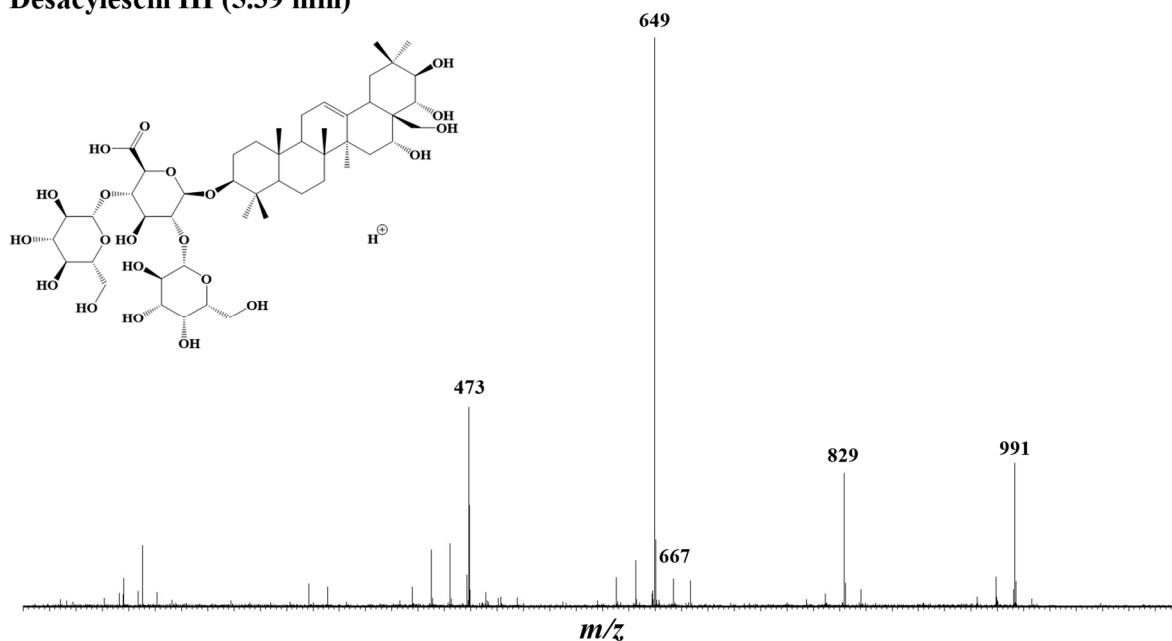

**Figure S21:** LC-MSMS(+) analysis of Hydrolysis extract (HE): CID spectrum (15 eV) recorded for the  $m/z$  991 precursor ions  $[M+H]^+$  at 5.39 min retention time (Desacylescin III)

**Escin IV (6.10 min)**

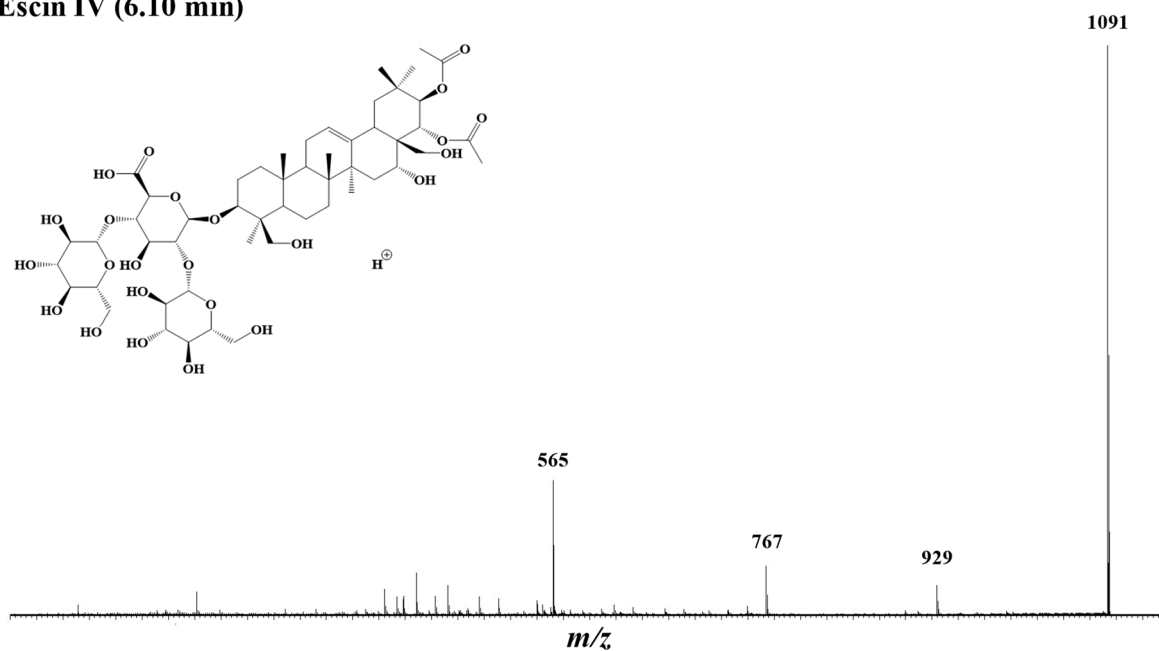

**Figure S22:** LC-MSMS(+) analysis of Natural extract (NE): CID spectrum (15 eV) recorded for the  $m/z$  1091 precursor ions  $[M+H]^+$  at 6.10 min retention time (Escin IV)

**Isoescsin IV (6.56 min)**

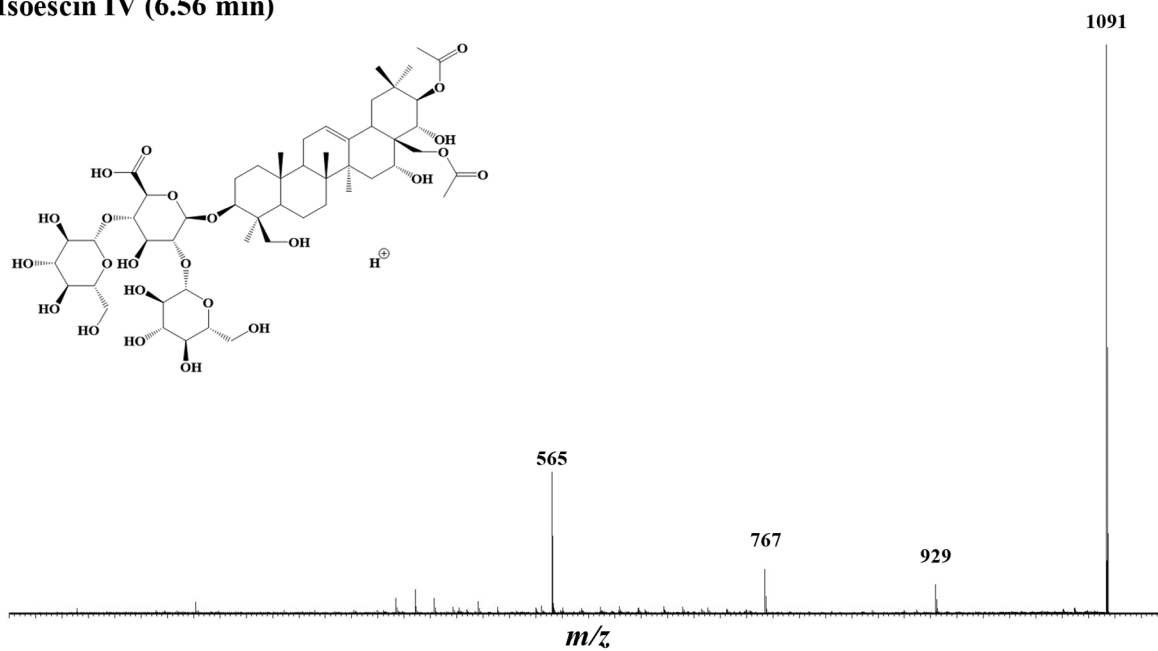

**Figure S23:** LC-MSMS(+) analysis of Natural extract (NE): CID spectrum (15 eV) recorded for the  $m/z$  1091 precursor ions  $[M+H]^+$  at 6.56 min retention time (Isoescsin IV)

**Escin V (7.71 min)**

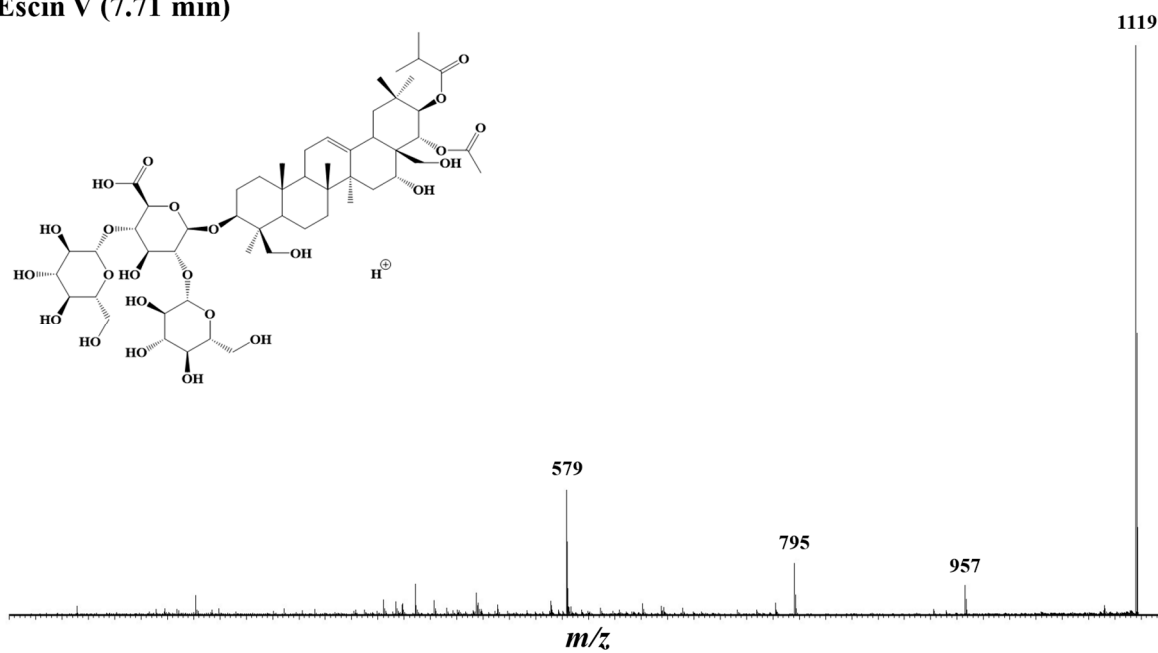

**Figure S24:** LC-MSMS(+) analysis of Natural extract (NE): CID spectrum (15 eV) recorded for the  $m/z$  1119 precursor ions  $[M+H]^+$  at 7.71 min retention time (Escin V)

**Isoescsin V (8.20 min)**

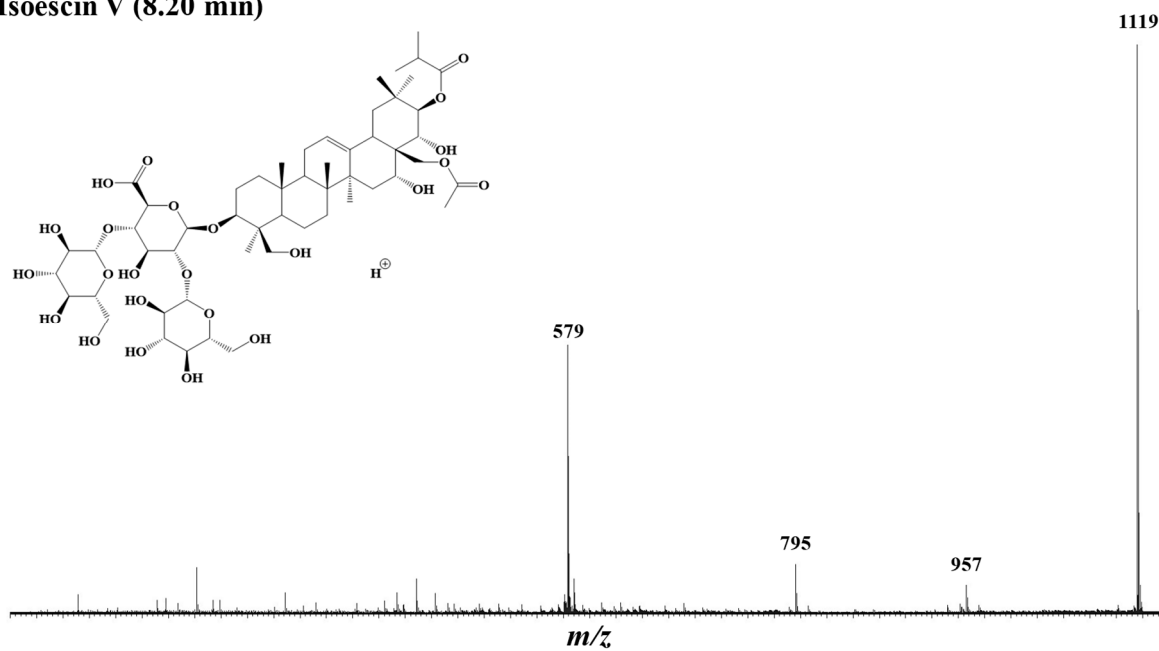

**Figure S25:** LC-MSMS(+) analysis of Natural extract (NE): CID spectrum (15 eV) recorded for the  $m/z$  1119 precursor ions  $[M+H]^+$  at 8.20 min retention time (Isoescsin V)

**Escin VI (8.62 min)**

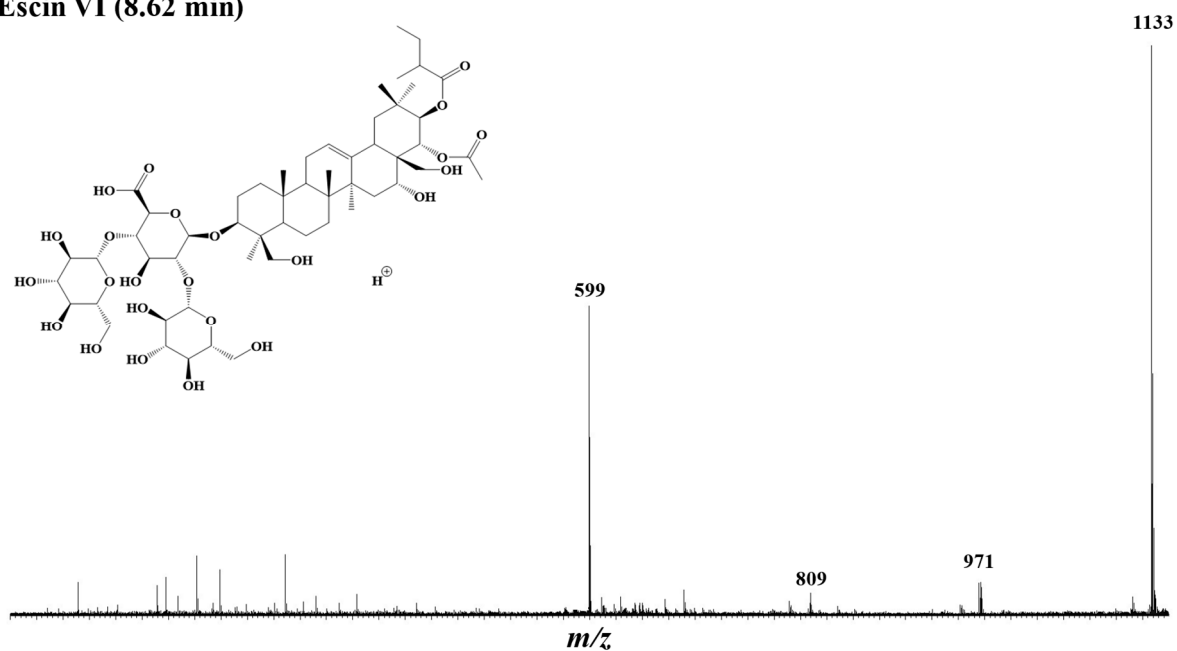

**Figure S26:** LC-MSMS(+) analysis of Natural extract (NE): CID spectrum (15 eV) recorded for the  $m/z$  1133 precursor ions  $[M+H]^+$  at 8.62 min retention time (Escin VI)

**Isoescsin VI (9.47 min)**

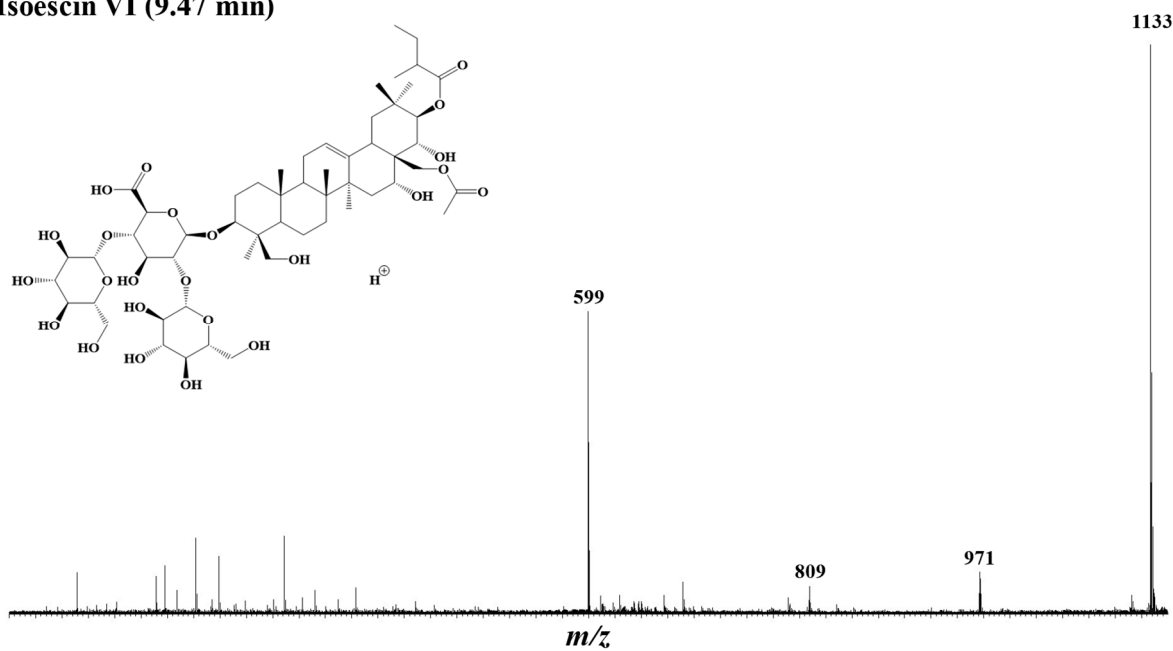

**Figure S27:** LC-MSMS(+) analysis of Natural extract (NE): CID spectrum (15 eV) recorded for the  $m/z$  1133 precursor ions  $[M+H]^+$  at 9.47 min retention time (Isoescsin VI)

**Escsin VII (6.12 min)**

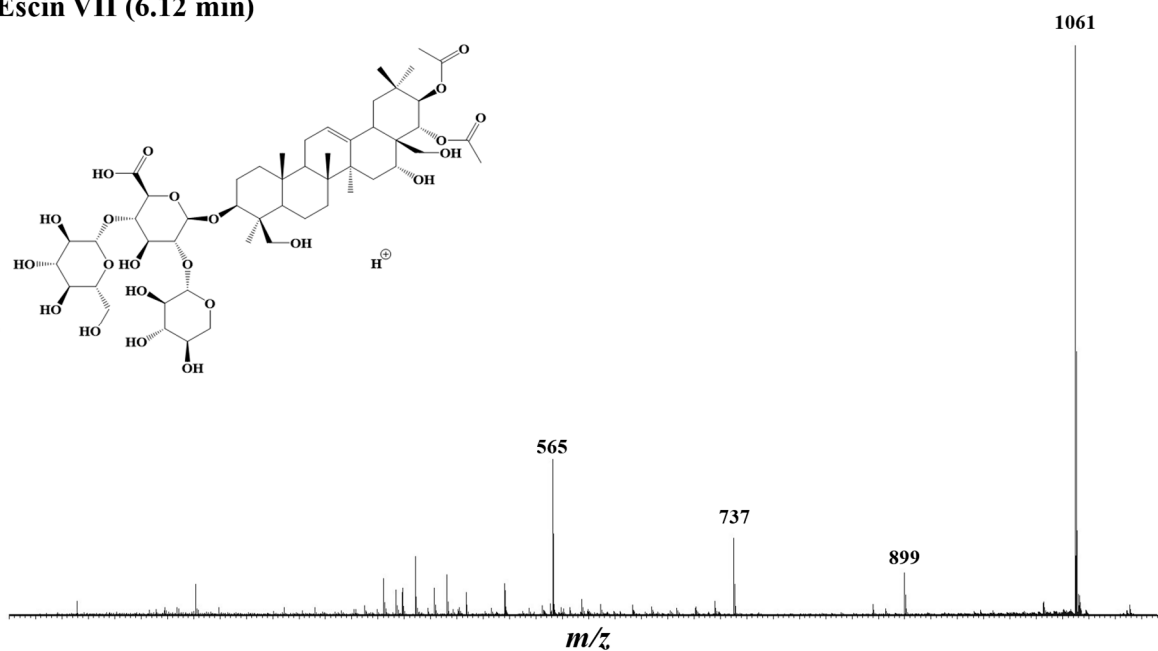

**Figure S28:** LC-MSMS(+) analysis of Natural extract (NE): CID spectrum (15 eV) recorded for the  $m/z$  1061 precursor ions  $[M+H]^+$  at 6.12 min retention time (Escsin VII)

**Isoescsin VII (6.59 min)**

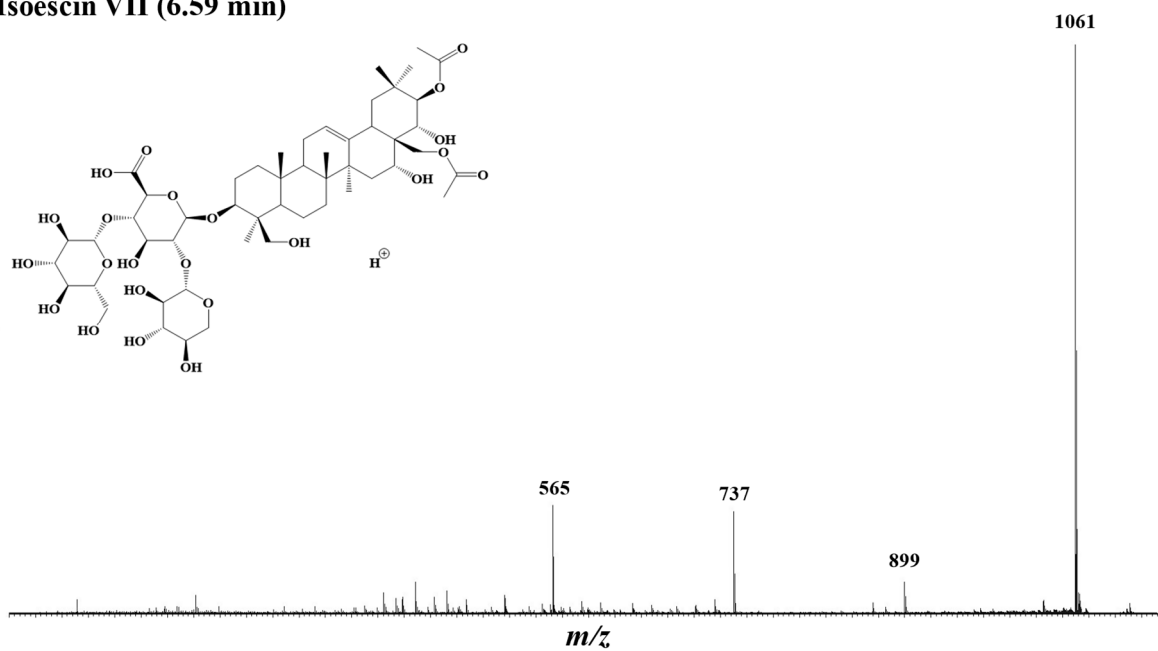

**Figure S29:** LC-MSMS(+) analysis of Natural extract (NE): CID spectrum (15 eV) recorded for the  $m/z$  1061 precursor ions  $[M+H]^+$  at 6.59 min retention time (Isoescsin VII)

**Escin VIII (7.42 min)**

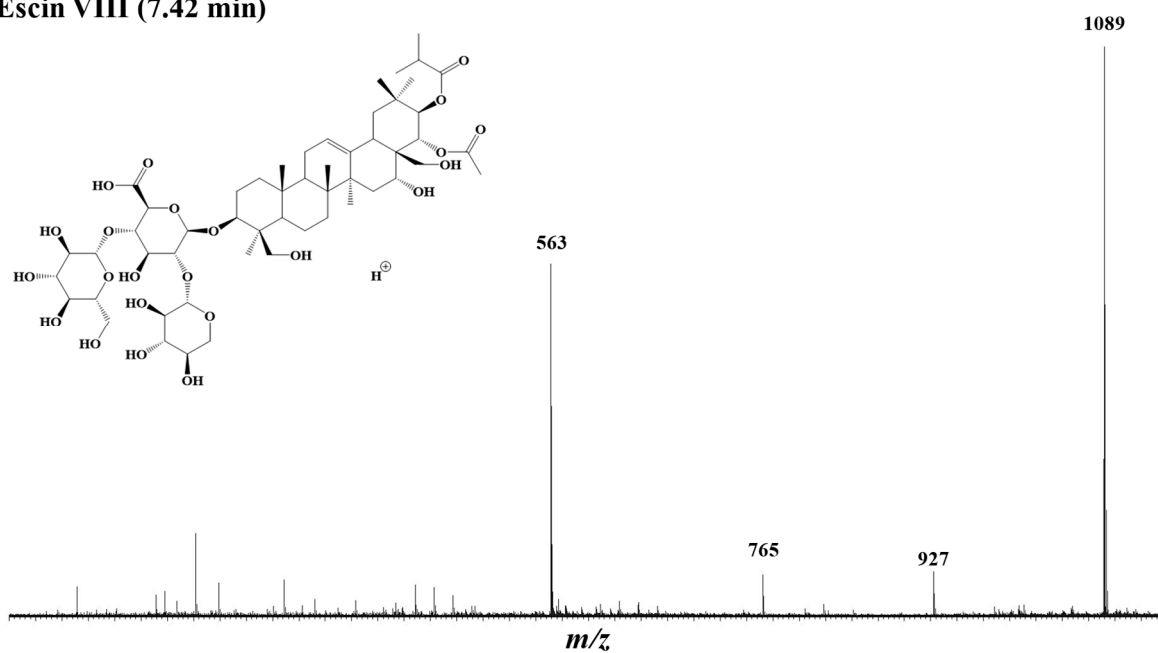

**Figure S30:** LC-MSMS(+) analysis of Natural extract (NE): CID spectrum (15 eV) recorded for the  $m/z$  1089 precursor ions  $[M+H]^+$  at 7.42 min retention time (Escin VIII)



**Isoescsin VIII (7.64 min)**

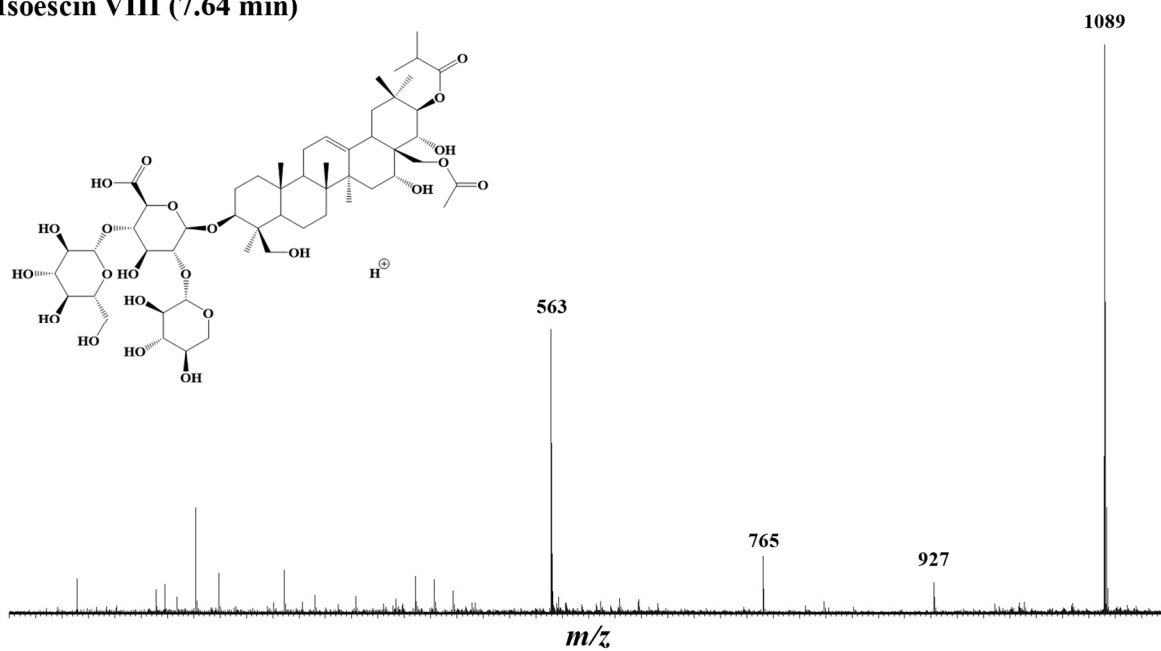

**Figure S31:** LC-MSMS(+) analysis of Natural extract (NE): CID spectrum (15 eV) recorded for the  $m/z$  1089 precursor ions  $[M+H]^+$  at 7.64 min retention time (Isoescsin VIII)

**Escin IX (6.44 min)**

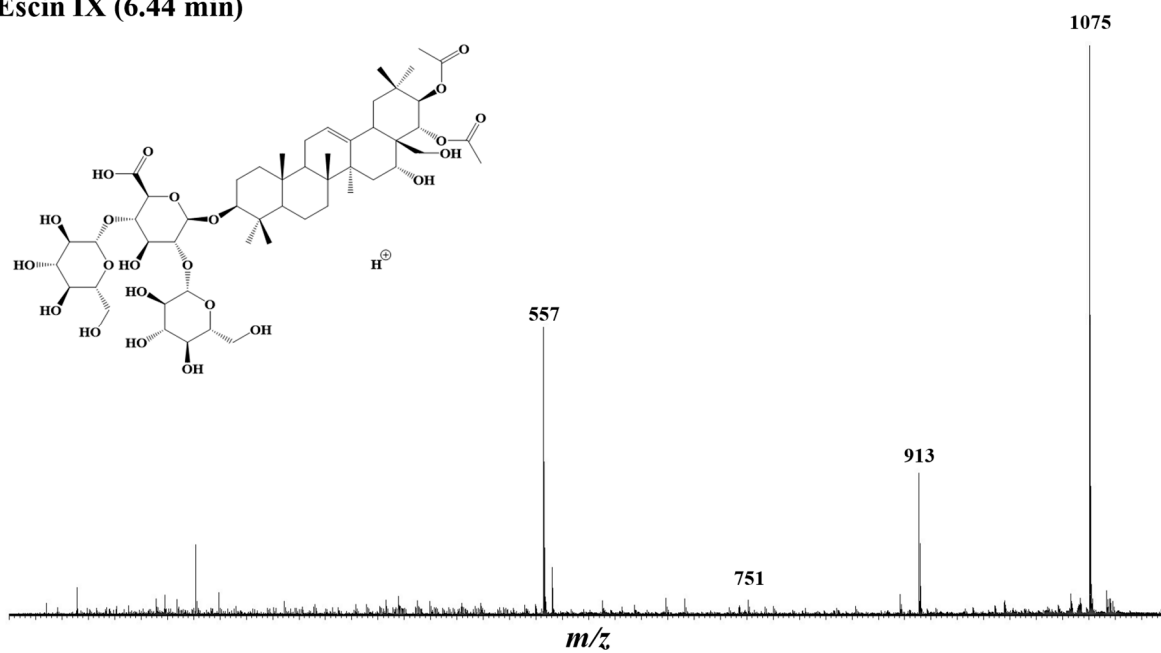

**Figure S32:** LC-MSMS(+) analysis of Natural extract (NE): CID spectrum (15 eV) recorded for the  $m/z$  1075 precursor ions  $[M+H]^+$  at 6.44 min retention time (Escin IX)

**Isoescsin IX (6.83 min)**

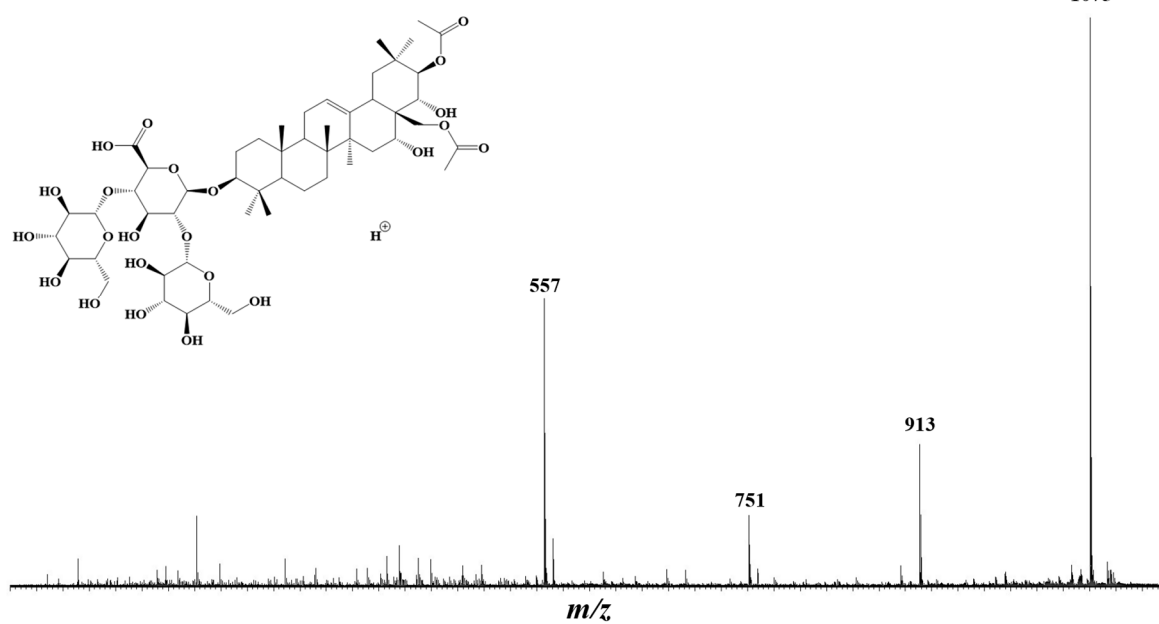

**Figure S33:** LC-MSMS(+) analysis of Natural extract (NE): CID spectrum (15 eV) recorded for the  $m/z$  1075 precursor ions  $[M+H]^+$  at 6.83 min retention time (Isoescsin IX)
